# Supplementary material for: Metabolism and Occurrence of Methanogenic and Sulfate-Reducing Syntrophic Acetate Oxidizing Communities in Haloalkaline Environments
Source: Front Microbiol. 2018 Dec 10;9:3039. doi: 10.3389/fmicb.2018.03039 (PMC6295475; doi:10.3389/fmicb.2018.03039)
Supplement: Supplementary file 2 [file Data_Sheet_1.xlsx]

## Sheet: MSAO_Bac1 draft genome
Supplementary data S1: Genes organised by specific metabolic catagories present in the metagenome-assembled genome of MSAO_Bac 1 ('Candidatus Syntrophonatronum acetioxidans') and their corresponding contig number
	MSAO_Bac1
Acetate metabolism
Acetate activation
AMP-forming acetate-CoA ligase	k121-3905-cds11+cds12 / k121-561-cds7
acylphosphatase	k121-6797-cds35
phenylacetate-CoA ligase	k121-6797-cds20 / k121-3180-cds4
Wood-Ljungdahl pathway
CO dehydrogenase /acetyl-COA synthase	k121-702
Methyltransferase	k121-702
Methylene-THF-reductase	k121-702 / k121-3777
methylene-THF-dehydrogenase / methenyl-THF cyclohydrolase	k121-325
formyl-THF synthetase	k121-6012
formate dehydrogenase	k121-1471 / k121-1718 / k121-2457 / k121-3286 / k121-4883 / k121-6301
Compatible solutes biosynthesis
L-proline biosynthesis (arginase 2 pathway degradation)
SpeB COG0010 305 Arginase/agmatinase/formimionoglutamate hydrolase, arginase family	k121-2696-cds24
ArgD COG4992 404 Ornithine/acetylornithine aminotransferase / acetylornithine aminotransferase	k121-1471-cds9
ProC COG0345 266 Pyrroline-5-carboxylate reductase	k121-1211-cds18
L-proline biosynthesis I (from glutamate)
TIGR01027 proB 363 glutamate 5-kinase	k121-1211-cds17
TIGR00407 proA 398 glutamate-5-semialdehyde dehydrogenase	k121-1211-cds16
ProC COG0345 266 Pyrroline-5-carboxylate reductase	k121-1211-cds18
Choline biosynthesis
diacylglycerol kinase	k121-2772-cds2
phosphatidate cytidylyltransferase	k121-3334-cds5
No genes for further conversion to choline
Glycine betaine biosynthesis (from glycine betaine aldehyde from choline)
No choline dehydrogenase or choline mooxygenase found (that converts choline to glycine betaine aldehyde)
TIGR01804 BADH 467 betaine aldehyde dehydrogenase	k121-1838-cds1
Serine and Glycine synthesis from 3-phospoglycerate
Phosphoglycerate dehydrogenase	k121-6420-cds1
Phosphoserine aminotransferase	k121-7861-cds2
Phosphoserine phosphatase (produces serine)	k121-1645-cds10
serine hydroxymethyl transferase (produces glycine)	k121-2696-cds48
glycine betaine biosynthesis IV (glycine from serine)
GlyA COG0112 413 Glycine/serine hydroxymethyltransferase	k121-2696-cds48
Glycine from glyoxylate
alanine-glyoxylate transaminase	k121-3258-cds5
Glycine betaine (trimethylglycine) from glycine betaine aldehyde
betaine aldehyde dehydrogenase	k121-1838-cds1
Glycine betaine from glycine via sarcosine
glycine methyltransferase	k121-2696-cds48
protein-S-isoprenylcysteine methyltransferase?	k121-1838-cds2
Transporters
Compatible solutes uptake systems
high-affinity choline/glycine uptake protein (BetT)	k121-4019
glycine betaine ABC transport system (OpuAA/AB/AC)	k121-3221
L-proline/glycine betaine ABC transporters	k121-6012
sodium:alanine symporter	k121-1627
sodium:dicarboxylate symporter	k121-3221
sodium:glutamate symporter	k121-7007
Na+/solute symporter	k121-3905-cds13
Na+/phosphate symporter	k121-2696 / k121-3840
ABC transporters, divalent ion uptake systems and antiporters
Magnesium/cobalt/nickel P-type ATPase transporters (MgtE)	k121-494 / k121-934 / k121-716 / k121-5569 / k121-7749 / k121-8456 / k121-934
Magnesium/cobalt transporter	k121-1732-cds8
Cobalt/zinc/cadmium transporters	k121-716 / k121-8456
Cobalt ABC transporter	k121-1627 / k121-1766 / k121-3221
Chromate transporter	k121-1627
Manganese/zinc ABC transporter	k121-1613-cds19
Tungsten transporters	k121-4019
Calcium/Na+ antiporter	k121-2696
ABC-type dipeptide/oligopeptide/nickel transport system	k121-1766 / k121-4297 / k121-606 / k121-891
ABC-type phosphate transport system	k121-2523
ABC-type Fe3+-hydroxamate transport system	k121-2698
Fe2+ transport system	k121-6012
Nickel import protein	k121-4083 / k121-891
K+ uptake protein TrkA	k121-1718-cds28
K+ uptake protein TrkH/TrkG	k121-2698-cds22
Na+ efflux system NatB	k121-1613-cds22
single unit Na+/H+ antiporter Nha	k121-1712-cds1
multi-unit Na+/H+ antiporter Mnh	k121-5712
Na+/H+ translocating pyrophosphatase	k121-624-cds1 / k121-2813-cds3 / k121-5344-cds1
Energy conservation
Rnf complex
RnfD	k121-8095-cds1
RnfG	k121-8095-cds2 / k121-4971-cds2
RnfC	k121-4971-cds1
NADH:ubiquinone oxidoreductase
NuoE	k121-1524-cds2 / k121-1040-cds5 / k121-1211-cds23
NuoFI	k121-1524-cds3 / k121-1211-cds24
NuoG	k121-1524-cds4 / k121-1040-cds7
MvhD/HdrABC complex
FAD-dependent pyridine nucleotide-disulfide oxidoreductase / heterodisulfide reductase subunit A (HdrA / MvhB)	k121-702-cds5
methyl-viologen-reducing hydrogenase delta subunit	k121-702-cds6
FAD-dependent pyridine nucleotide-disulfide oxidoreductase HdrA and related polyferredoxins	k121-702-cds9
pyridine nucleotide-disulfide oxidoreductase	k121-702-cds11
heterodisulfide reductase subunit B	k121-4746-cds3
heterodisulfide reductase subunit C	k121-4746-cds4
[NiFe] hydrogenase 1
Ni,Fe-hydrogenase I small subunit HyaA	k121-2698-cds18
Ni,Fe-hydrogenase I large subunit HyaB	k121-2698-cds19
Ni,Fe-hydrogenase I cytochrome b subunit HyaC	k121-2698-cds20
[NiFe] hydrogenase 2
Ni,Fe-hydrogenase maturation factor HyaD	k121-3777-cds3
Ni,Fe-hydrogenase I large subunit HyaB	k121-3777-cds6
Ni,Fe-hydrogenase I small subunit HyaA	k121-3777-cds7
hydrogenase nickel incorporation protein hypA	k121-3777-cds8
Ni2+-binding GTPase involved in regulation of expression and maturation of urease and hydrogenase HypB	k121-3777-cds9
Hydrogenase maturation factor HypF	k121-3777-cds10
hydrogenase assembly protein HypC	k121-3777-cds11
F0F1 ATP synthase
ATP synthase F0 subunit A	k121-2696-cds54
F0F1 ATP synthase subunit C	k121-2696-cds55
ATP synthase subunit B	k121-2696-cds56
ATP synthase F0F1 subunit delta	k121-2696-cds57
F0F1 ATP synthase subunit alpha	k121-2696-cds58
F0F1 ATP synthase subunit gamma	k121-2696-cds59
F0F1 ATP synthase subunit beta	k121-2696-cds60
ATP synthase epsilon chain	k121-2696-cds61
