# Supplementary material for: Metabolism and Occurrence of Methanogenic and Sulfate-Reducing Syntrophic Acetate Oxidizing Communities in Haloalkaline Environments
Source: Front Microbiol. 2018 Dec 10;9:3039. doi: 10.3389/fmicb.2018.03039 (PMC6295475; doi:10.3389/fmicb.2018.03039)
Supplement: Supplementary file 3 [file Data_Sheet_2.xlsx]

## Sheet: WL-check
Supplementary data S2: Presence/absence table of genes involved in the Wood-Ljungdahl pathway and acetate conversions in the available Syntrophomonadaceae (draft) genomes (basis for Figure 5). The search was based on KEGG orthologues and the respective Knumbers are listed here.
Knumber	Pathway	reaction	enzyme	gene	database	EC	bin.B1Sed10.123	bin.B1Sed10.173	bin.B1Sed10.21	bin.B1Sed10.50	bin.B1Sed10.67	bin.B1Sed10.74	bin.B1Sed10.75	bin.B1Sed10.8	bin.CSSed10.148R1	bin.CSSed10.167	bin.CSSed10.277R1	bin.CSSed10.444	bin.CSSed10.9	bin.CSSed11.109	bin.CSSed11.131	bin.CSSed11.134	bin.CSSed11.158R1	bin.CSSed11.181	bin.CSSed11.206R1	bin.CSSed11.224R2	bin.CSSed11.298R1	bin.CSSed11.39	bin.CSSed11.70	bin.T1Sed10.110R1	bin.T1Sed10.137	bin.T1Sed10.145	bin.T1Sed10.166	bin.T1Sed10.174R1	bin.T1Sed10.2	bin.T1Sed10.56	bin.T1Sed10.67	bin.T1Sed10.71R2	bin.T1Sed10.80R1	bin.T3Sed10.148R1	bin.T3Sed10.167	bin.T3Sed10.337	Dethiobacter_alkaliphilus_AHT1	MSAO_Bac1	Syntrophomonas_palmitatica_JCM_14374	Syntrophomonas_wolfei_subsp_wolfei_str_Goettingen_G311	Syntrophothermus_lipocaldus_DSM_12680	Thermosyntropha_lipolytica_DSM_11003
K00925	acetogenesis/acetate -> methane	ATP + acetate = ADP + acetyl phosphate	acetate kinase	ackA	KEGG	2.7.2.1	X	X	X	X	X	X	X	X	X	X	X	V	V	X	X	X	X	X	X	V	X	X	X	X	V	X	X	X	X	X	X	X	X	X	X	X	X	X	V	V	V	V
K00625	acetogenesis/acetate -> methane	acetyl-CoA + phosphate = CoA + acetyl phosphate	phosphate acetyltransferase	pta	KEGG	2.3.1.8	X	X	X	X	X	X	X	X	X	X	X	X	V	X	X	X	X	V	X	V	X	X	X	X	X	X	V	X	X	X	X	X	X	X	X	X	X	X	V	V	V	V
K15024		acetyl-CoA + phosphate = CoA + acetyl phosphate	putative phosphotransacetylase		KEGG	2.3.1.8	X	X	X	X	X	X	X	X	X	X	X	V	X	X	X	X	X	X	X	X	X	X	X	X	V	X	X	X	X	X	X	X	X	X	X	X	X	X	X	X	X	X
K01895	acetate assimilation	ATP + acetate + CoA = AMP + diphosphate + acetyl-CoA	acetyl-coA synthetase	ACSS	KEGG	6.2.1.1	V	V	V	V	V	V	V	V	V	V	V	X	V	X	X	V	V	V	X	V	V	V	V	V	X	V	V	V	V	V	V	V	V	V	V	X	V	V	X	X	X	X
K15987	primary sodium pump	diphosphate + H2O = 2 phosphate	K+-stimulated phyrophosphate-energized sodium pump (H+/Na+ translocating pyrophosphatases)	hppA	KEGG	3.6.1.1	V	V	V	V	X	V	V	X	V	X	X	V	V	V	V	V	X	V	X	X	V	V	X	V	X	X	V	V	V	X	V	V	X	V	V	V	V	V	X	V	V	V
K01912	acetate, propionate, butyrate activation?	ATP + phenylacetate + CoA = AMP + diphosphate + phenylacetyl-CoA	phenylacetate-CoA ligase	paaK	KEGG	6.2.1.30	V	V	V	V	V	V	V	V	V	V	V	V	V	V	V	V	V	V	X	V	V	V	X	V	V	V	V	V	V	V	V	V	V	V	V	V	V	V	V	V	V	V
K00194	Wood-Ljungdahyl -Western branch	a [methyl-Co(III) corrinoid Fe-S protein] + tetrahydrosarcinapterin = a [Co(I) corrinoid Fe-S protein] + 5-methyltetrahydrosarcinapterin	acetyl-CoA decarbonylase/synthase complex subunit delta	cdhD/acsD	KEGG	2.1.1.245	X	X	V	V	V	X	V	X	V	X	X	X	V	V	V	V	X	V	V	V	V	V	V	X	V	X	V	V	V	X	X	X	X	V	V	V	V	V	X	X	X	X
K00197	Wood-Ljungdahyl -Western branch	a [methyl-Co(III) corrinoid Fe-S protein] + tetrahydrosarcinapterin = a [Co(I) corrinoid Fe-S protein] + 5-methyltetrahydrosarcinapterin	acetyl-CoA decarbonylase/synthase complex subunit gamma	cdhE/acsC	KEGG	2.1.1.245	X	X	V	V	V	X	V	X	V	X	X	X	V	V	V	V	X	V	V	V	V	V	V	X	V	X	V	V	V	X	X	X	X	V	V	V	V	V	X	X	X	X
K15023	Wood-Ljungdahl -Western branch (Bacteria)	a [methyl-Co(III) corrinoid Fe-S protein] + tetrahydrofolate = a [Co(I) corrinoid Fe-S protein] + 5-methyltetrahydrofolate	5-methyltetrahydrofolate corrinoid/iron sulfur protein methyltransferase	acsE	KEGG	2.1.1.258	X	X	X	V	V	X	V	X	V	X	X	X	V	V	V	V	X	V	X	V	V	X	V	X	V	X	V	V	V	X	X	X	X	V	X	V	V	V	X	X	X	X
K14138	Wood-Ljungdahl -Western branch (Bacteria)	acetyl-CoA + a [Co(I) corrinoid Fe-S protein] = CO + CoA + a [methyl-Co(III) corrinoid Fe-S protein]	acetyl-CoA synthase	acsB	KEGG	2.3.1.169	V	V	V	V	V	X	V	X	V	X	X	X	V	V	V	V	X	V	V	V	V	V	V	X	V	V	X	V	V	X	V	V	X	V	V	V	V	V	X	X	X	X
K00198	Wood-Ljungdahl -Western branch/CODH (Bacteria)	CO + H2O + 2 oxidized ferredoxin = CO2 + 2 reduced ferredoxin + 2 H+	anaerobic carbon-monoxide dehydrogenase catalytic subunit	acsA/CooS	KEGG	1.2.7.4	V	V	X	V	V	V	V	X	V	X	X	X	V	V	V	V	X	V	V	V	V	V	V	V	X	V	V	V	V	X	V	V	V	V	V	V	V	V	X	X	X	X
K00297	Wood-Ljungdahl -Eastern branch/TH4 (acetogens/SRB)	5-methyltetrahydrofolate + NAD(P)+ = 5,10-methylenetetrahydrofolate + NAD(P)H + H+	methylenetetrahydrofolate reductase (NADPH)	metF/MTHFR	KEGG	1.5.1.20	X	X	X	X	V	X	V	X	V	X	X	V	V	V	X	V	X	V	X	V	V	X	V	X	X	X	X	V	V	X	V	X	X	V	X	X	V	V	V	V	V	V
K01491	Wood-Ljungdahl -Eastern branch/TH4 (acetogens/SRB)	5,10-methenyltetrahydrofolate + H2O = 10-formyltetrahydrofolate/5,10-methylenetetrahydrofolate + NADP+ = 5,10-methenyltetrahydrofolate + NADPH + H+	methenyltetrahydrofolate cyclohydrolase/methylenetetrahydrofolate dehydrogenase (NADP+)	folD	KEGG	3.5.4.9/1.5.1.5	V	V	V	V	V	V	V	V	V	V	V	V	V	V	V	X	X	V	V	V	V	X	V	V	V	X	V	V	V	V	V	V	V	V	V	V	V	V	V	V	V	V
K01938	Wood-Ljungdahl -Eastern branch/TH4 (acetogens/SRB)	ATP + formate + tetrahydrofolate = ADP + phosphate + 10-formyltetrahydrofolate	formate--tetrahydrofolate ligase	fhs	KEGG	6.3.4.3	V	V	V	V	V	V	V	X	X	V	X	V	X	V	V	V	V	V	X	V	V	V	X	V	V	X	V	V	V	V	V	V	V	V	V	X	V	V	V	V	V	V
K00123	Wood-Ljungdahl -Eastern branch/TH4 (SRB)	formate + NAD+ = CO2 + NADH	formate dehydrogenase major subunit	fdoG/fdhF	KEGG	1.17.1.9	V	X	V	X	X	V	V	V	V	V	V	X	V	V	V	X	X	V	X	V	V	V	X	V	V	V	V	V	V	V	V	V	X	V	V	V	V	V	V	V	V	X
K00124	Wood-Ljungdahl -Eastern branch/TH4 (SRB)		formate dehydrogenase iron-sulfur subunit	fdoH	KEGG		X	V	X	X	X	V	V	V	V	X	V	X	V	X	X	X	V	V	X	V	V	V	X	V	V	X	V	V	X	V	V	V	X	X	X	V	X	V	X	V	V	X
K05299	Wood-Ljungdahl -Eastern branch/TH4 (acetogens)	CO2 + NADPH = formate + NADP+	formate dehydrogenase (NADP+) alpha subunit	fdhA	KEGG	1.17.1.10	V	V	V	V	V	X	V	V	X	V	V	X	X	X	X	V	X	X	X	V	X	V	X	X	V	V	X	V	V	V	X	V	V	V	X	X	X	X	X	V	V	X
K15022	Wood-Ljungdahl -Eastern branch/TH4 (acetogens)	CO2 + NADPH = formate + NADP+	formate dehydrogenase (NADP+) beta subunit	fdhB	KEGG	1.17.1.10	V	V	V	V	V	V	V	V	X	V	V	X	X	X	X	V	X	X	X	V	X	V	X	X	X	V	X	V	V	V	X	V	X	V	X	V	X	X	X	X	X	X
K03620	hydrogen oxidation/production ~ [NiFe] hydrogenase I b-type cytochrome subunit			hyaC	KEGG		X	X	X	X	X	X	X	X	X	X	X	X	X	X	X	X	X	X	X	X	X	X	X	X	X	X	X	X	X	X	X	X	X	X	X	X	X	V	X	X	V	X
K06281	hydrogen oxidation/production ~ [NiFe] hydrogenase I large subunit	H2 + acceptor = reduced acceptor	hydrogenase large subunit	hyaB	KEGG	1.12.99.6	X	X	X	X	X	X	X	X	X	X	X	X	X	V	V	X	X	X	X	X	V	X	X	V	X	X	X	X	X	X	X	X	X	X	X	X	V	V	X	X	V	X
K06282	hydrogen oxidation/production ~ [NiFe] hydrogenase I small subunit	H2 + acceptor = reduced acceptor	hydrogenase small subunit	hyaA	KEGG	1.12.99.6	X	X	X	X	X	X	X	X	V	X	X	X	X	V	V	X	X	X	X	X	V	X	X	V	X	X	X	X	X	X	V	X	X	X	X	X	V	V	X	X	V	X
K00169	Pyruvate metabolism	pyruvate + CoA + 2 oxidized ferredoxin = acetyl-CoA + CO2 + 2 reduced ferredoxin + 2 H+	pyruvate ferredoxin oxidoreductase alpha subunit	porA	KEGG	1.2.7.1	V	V	V	V	V	V	V	X	V	V	V	X	V	V	X	V	X	V	V	X	V	V	V	V	V	X	V	V	V	V	V	V	V	X	V	V	V	V	V	V	X	X
K00170	Pyruvate metabolism	pyruvate + CoA + 2 oxidized ferredoxin = acetyl-CoA + CO2 + 2 reduced ferredoxin + 2 H+	pyruvate ferredoxin oxidoreductase beta subunit	porB	KEGG	1.2.7.1	V	V	V	X	V	V	V	X	V	X	V	X	V	V	V	V	X	V	V	X	V	V	V	V	V	X	V	V	V	V	V	V	V	V	V	V	V	V	V	V	X	X
K00844	Glycolysis - EMP	ATP + D-hexose = ADP + D-hexose 6-phosphate	hexokinase	HK	KEGG	2.7.1.1	X	X	X	X	X	X	X	X	X	X	X	X	X	X	X	X	X	X	X	X	X	X	X	X	X	X	X	X	X	X	X	X	X	X	X	X	X	X	V	X	X	X
K00848	Glycolysis - EMP	ATP + D-glucose = ADP + D-glucose 6-phosphate	glucokinase	glk	KEGG	2.7.1.2	X	X	X	X	X	X	X	X	X	X	X	V	X	X	X	X	X	X	X	X	X	X	X	X	X	X	X	X	X	X	X	X	X	X	X	X	X	X	X	X	X	X
K00850	Glycolysis - EMP	ATP + D-fructose 6-phosphate = ADP + D-fructose 1,6-bisphosphate	6-phosphofructokinase 1	pfkA/PFK	KEGG	2.7.1.11	V	V	V	V	V	V	V	V	V	V	V	V	V	V	V	V	V	X	V	X	V	V	V	V	V	V	V	V	V	V	V	V	V	V	V	V	V	V	X	V	V	X
K00873	Glycolysis - EMP	ATP + pyruvate = ADP + phosphoenolpyruvate	pyruvate kinase	PK/pyk	KEGG	2.7.1.40	V	V	V	V	V	V	X	V	V	V	V	V	V	V	X	V	X	V	V	X	V	V	V	V	V	X	V	X	V	X	V	V	V	V	X	V	V	V	X	V	V	V
Absent from all MAGs in tree
K00200	Wood-Ljungdahl -Eastern branch/H4MPT (methanogens)	a formylmethanofuran + H2O + 2 oxidized ferredoxin [iron-sulfur] cluster = CO2 + a methanofuran + 2 reduced ferredoxin [iron-sulfur] cluster + 2 H+	formylmethanofuran dehydrogenase subunit A	fwdA/fmdA	KEGG	1.2.7.12
K00201	Wood-Ljungdahl -Eastern branch/H4MPT (methanogens)	a formylmethanofuran + H2O + 2 oxidized ferredoxin [iron-sulfur] cluster = CO2 + a methanofuran + 2 reduced ferredoxin [iron-sulfur] cluster + 2 H+	formylmethanofuran dehydrogenase subunit B	fwdB/fmdB	KEGG	1.2.7.12
K00202	Wood-Ljungdahl -Eastern branch/H4MPT (methanogens)	a formylmethanofuran + H2O + 2 oxidized ferredoxin [iron-sulfur] cluster = CO2 + a methanofuran + 2 reduced ferredoxin [iron-sulfur] cluster + 2 H+	formylmethanofuran dehydrogenase subunit C	fwdC/fmdC	KEGG	1.2.7.12
K00203	Wood-Ljungdahl -Eastern branch/H4MPT (methanogens)	a formylmethanofuran + H2O + 2 oxidized ferredoxin [iron-sulfur] cluster = CO2 + a methanofuran + 2 reduced ferredoxin [iron-sulfur] cluster + 2 H+	formylmethanofuran dehydrogenase subunit D	fwdD/fmdD	KEGG	1.2.7.12
K00319	Wood-Ljungdahl -Eastern branch/H4MPT (methanogens)	5,10-methylenetetrahydromethanopterin + oxidized coenzyme F420 = 5,10-methenyltetrahydromethanopterin + reduced coenzyme F420	methylenetetrahydromethanopterin dehydrogenase	mtd	KEGG	1.5.98.1
K00320	Wood-Ljungdahl -Eastern branch/H4MPT (methanogens)	5-methyltetrahydromethanopterin + oxidized coenzyme F420 = 5,10-methylenetetrahydromethanopterin + reduced coenzyme F420	5-methyltetrahydromethanopterin:coenzyme-F420 oxidoreductase	mer	KEGG	1.5.98.2
K00672	Wood-Ljungdahl -Eastern branch/H4MPT (methanogens)	formylmethanofuran + 5,6,7,8-tetrahydromethanopterin = methanofuran + 5-formyl-5,6,7,8-tetrahydromethanopterin	formylmethanofuran--tetrahydromethanopterin N-formyltransferase	ftr	KEGG	2.3.1.101
K00125	Wood-Ljungdahl -Eastern branch/TH4 (SRB)	formate + NAD+ = CO2 + NADH	formate dehydrogenase, beta subunit	fdhB	KEGG	1.17.1.9
K00126	Wood-Ljungdahl -Eastern branch/TH4 (SRB)	formate + NAD+ = CO2 + NADH	formate dehydrogenase subunit delta	fdsD	KEGG	1.17.1.9
K00122	Wood-Ljungdahl -Eastern branch/TH4 (SRB)	formate + NAD+ = CO2 + NADH	formate dehydrogenase	FDH	KEGG	1.17.1.9
K00192	Wood-Ljungdahl -Western branch (Archaea)	CO + H2O + 2 oxidized ferredoxin = CO2 + 2 reduced ferredoxin + 2 H+	acetyl-CoA decarbonylase/synthase complex subunit alpha	cdhA	KEGG	1.2.7.4
K00193	Wood-Ljungdahl -Western branch (Archaea)		acetyl-CoA decarbonylase/synthase complex subunit beta	cdhC	KEGG	2.3.1.-
K00195	Wood-Ljungdahl -Western branch (Archaea)		acetyl-CoA decarbonylase/synthase complex subunit epsilon	cdhB	KEGG
K13788	acetogenesis/acetate -> methane	acetyl-CoA + phosphate = CoA + acetyl phosphate	phosphate acetyltransferase	pta	KEGG	2.3.1.8
K01690	Glycolysis- ED	6-phospho-D-gluconate = 2-dehydro-3-deoxy-6-phospho-D-gluconate + H2O	phosphogluconate dehydratase	edd	KEGG	4.2.1.12
K00886	Glycolysis - EMP	(phosphate)n + D-glucose = (phosphate)n-1 + D-glucose 6-phosphate	polyphosphate glucokinase	ppgK	KEGG	2.7.1.63
K00918	Glycolysis - EMP	ADP + D-fructose 6-phosphate = AMP + D-fructose 1,6-bisphosphate/ADP + D-glucose = AMP + D-glucose 6-phosphate	ADP-dependent phosphofructokinase/glucokinase	pfkC	KEGG	2.7.1.146/147
K00918	Glycolysis - EMP	ADP + D-glucose = AMP + D-glucose 6-phosphate	ADP-dependent phosphofructokinase/glucokinase	pfkC	KEGG	2.7.1.147
K08074	Glycolysis - EMP	ADP + D-glucose = AMP + D-glucose 6-phosphate	ADP-dependent glucokinase	ADPGK	KEGG	2.7.1.147
K12407	Glycolysis - EMP	ATP + D-glucose = ADP + D-glucose 6-phosphate	glucokinase	GCK	KEGG	2.7.1.2
K16370	Glycolysis - EMP	ATP + D-fructose 6-phosphate = ADP + D-fructose 1,6-bisphosphate	6-phosphofructokinase 2	pfkB	KEGG	2.7.1.11
