# Supplementary material for: Metabolism and Occurrence of Methanogenic and Sulfate-Reducing Syntrophic Acetate Oxidizing Communities in Haloalkaline Environments
Source: Front Microbiol. 2018 Dec 10;9:3039. doi: 10.3389/fmicb.2018.03039 (PMC6295475; doi:10.3389/fmicb.2018.03039)
Supplement: Supplementary file 4 [file Data_Sheet_3.xlsx]

## Sheet: MAGs
Supplementary data S3: Accession numbers and genome statistics of the available Syntrophomonadaceae-related MAGs previously obtained from Kulunda Steppe soda lakes.
MAG ID	BioSample	Genbank accession	Organism	Isolate	Size (Mb)	# Contigs	Contig N50 (kb)	Max contig length (kb)	Estimated coverage (x)	GC (%)	#5S rRNAs	#16S rRNAs	#23S rRNAs	# tRNAs	Compl (%)	Cont (%)	Str het (%)	ID longest 16S rRNA	Besthit Silva longest 16S rRNA	Silva taxonomy besthit longest 16S rRNA	%Identity	e-value	query length	query coverage	Besthit NCBI	%Identity	e-value	query coverage	Important hits	%Identity	e-value	query coverage
bin.CSSed11.141	SAMN08574683	PWSJ00000000	Syntrophomonadaceae bacterium	CSSed11_141	2.90825	447	7.527	47.115	5.51377	45.1	2	1	0	22	85.75	5.9	27.78	>CS-Sed11-C13922-16S_rRNA-1|CS-Sed11-C13922	GQ848219 uncultured Firmicutes bacterium	Bacteria/Firmicutes_Clostridia_2/Clostridiales _Syntrophomonadaceae/uncultured	95.3795	1e-134	343	88.3382	EU645089.1 Uncultured bacterium clone 20J24	97	6e-143	89
bin.B1Sed10.67	SAMN08575285	PUKV00000000	Syntrophomonadaceae bacterium B1Sed10_67	B1Sed10_67	2.16033	274	10.119	52.405	69.8655	49.4	0	1	0	26	76.92	2.15	42.86	>B1-Sed10-C18197-16S_rRNA-1|B1-Sed10-C18197	GQ848219 uncultured Firmicutes bacterium	Bacteria/Firmicutes_Clostridia_2/Clostridiales _Syntrophomonadaceae/uncultured	95.858	1e-155	381	88.7139	KJ704761.1 Uncultured bacterium clone c3-F04	98	1e-170	92
bin.T3Sed10.167	SAMN08574866	PWZJ00000000	Syntrophomonadaceae bacterium	T3Sed10_167	1.80895	381	5.01	15.009	2.49723	46.8	1	1	1	23	81.36	5.62	8	>T3-Sed10-C51742-16S_rRNA-1|T3-Sed10-C51742	HQ183812 uncultured Clostridia bacterium	Bacteria/Firmicutes_Clostridia_2/Clostridiales _Syntrophomonadaceae/Dethiobacter	87.4439	7e-57	331	67.3716	JX240659.1 Uncultured Firmicutes bacterium clone CSS81	86	4e-90	96
bin.CSSed11.181	SAMN08574710	PWTK00000000	Syntrophomonadaceae bacterium	CSSed11_181	1.82098	114	29.699	80.215	17.3768	55.4	0	1	0	27	73.94	1.06	25	>CS-Sed11-C27512-16S_rRNA-1|CS-Sed11-C27512	JF417912 uncultured bacterium	Bacteria/Firmicutes_Clostridia_2/Clostridiales _Syntrophomonadaceae/Dethiobacter	86.3081	1e-101	413	99.0315	DQ432277.1 Uncultured low G+C Gram-positive bacterium clone WN-HSB-149	88	6e-129	96
bin.CSSed11.109	SAMN08574673	PWRZ00000000	Syntrophomonadaceae bacterium	CSSed11_109	1.77051	225	11.972	71.584	31.9017	52.7	1	2	2	26	83.23	0.96	0	>CS-Sed11-C84428-16S_rRNA-1|CS-Sed11-C84428	JN173137 uncultured Clostridiales bacterium	Bacteria/Firmicutes_Clostridia_2/Clostridiales_ Syntrophomonadaceae/Dethiobacter	95.2816	0	666	98.6486	JN173137.1 Uncultured Clostridiales bacterium clone 714	95	0	100	KU681304.1 enrichment culture isolate Syntropholuna alkaliphila	94	0	85
bin.T3Sed10.116	SAMN08574829	PWXY00000000	Syntrophomonadaceae bacterium	T3Sed10_116	1.54287	250	6.74	56.452	13.4599	54.9	1	1	2	7	57.85	3.39	12.5	>T3-Sed10-C98527-16S_rRNA-1|T3-Sed10-C98527	JN173137 uncultured Clostridiales bacterium	Bacteria/Firmicutes_Clostridia_2/Clostridiales_ Syntrophomonadaceae/Dethiobacter	95.1294	0	666	98.6486	JN173137.1 Uncultured Clostridiales bacterium clone 714	95	0	100	KU681304.1 enrichment culture isolate Syntropholuna alkaliphila	94	0	85
bin.CSSed10.9	SAMN08574660	PWRN00000000	Syntrophomonadaceae bacterium	CSSed10_9	1.81199	108	36.203	111.547	25.3837	53.3	1	1	1	31	84.93	0.42	0	>CS-Sed10-C169-16S_rRNA-1|CS-Sed10-C169	JX240659 uncultured Firmicutes bacterium	Bacteria/Firmicutes_Clostridia_2/Clostridiales _Syntrophomonadaceae/Dethiobacter	94.2249	0	998	98.8978	JX240659.1 Uncultured Firmicutes bacterium clone CSS81	94	0	98	KU681304.1 enrichment culture isolate Syntropholuna alkaliphila	94	0	88
bin.T1Sed10.109	SAMN08575057	PWHY00000000	Syntrophomonadaceae bacterium	T1Sed10_109	1.32657	289	4.868	13.807	3.31082	45.5	0	1	0	19	62.29	1.29	0	>T1-Sed10-C45570-16S_rRNA-1|T1-Sed10-C45570	JX240659 uncultured Firmicutes bacterium	Bacteria/Firmicutes_Clostridia_2/Clostridiales _Syntrophomonadaceae/Dethiobacter	87	1e-104	408	98.0392	JX240659.1 Uncultured Firmicutes bacterium clone CSS81	88	3e-126	96	KU681304.1 enrichment culture isolate Syntropholuna alkaliphila	91	2e-111	71
bin.T3Sed10.15	SAMN08574852	PWYV00000000	Syntrophomonadaceae bacterium	T3Sed10_15	1.7029	127	27.89	179.725	12.9704	53.6	0	1	0	29	82.81	0.42	0	>T3-Sed10-C5756-16S_rRNA-1|T3-Sed10-C5756	JX240659 uncultured Firmicutes bacterium	Bacteria/Firmicutes_Clostridia_2/Clostridiales _Syntrophomonadaceae/Dethiobacter	94.4276	0	998	98.8978	JX240659.1 Uncultured Firmicutes bacterium clone CSS81	94	0	98	KU681304.1 enrichment culture isolate Syntropholuna alkaliphila	94	0	88
bin.B1Sed10.75	SAMN08575290	PUKQ00000000	Syntrophomonadaceae bacterium B1Sed10_75	B1Sed10_75	2.65013	280	14.645	54.386	12.2849	42.7	2	3	1	40	94.25	4.8	0	>B1-Sed10-C56714-23S_rRNA-1|B1-Sed10-C56714	JX240717 uncultured Firmicutes bacterium	Bacteria/Firmicutes_Clostridia_2/Clostridiales_ Syntrophomonadaceae/uncultured	93.8083	0	1216	96.9572	CP028514.1 Carboxydocella thermautotrophica strain 41	80	0	98
bin.T1Sed10.71R1	SAMN08575140	PWET00000000	Syntrophomonadaceae bacterium	T1Sed10_71R1	2.2134	284	10.885	51.335	18.0648	47.5	0	1	0	26	72.43	4.45	20	>T1-Sed10-C23059-16S_rRNA-1|T1-Sed10-C23059	KP174494 bacterium YC-ZSS-LKJ141	Bacteria/Firmicutes_Clostridia_2/Clostridiales _Syntrophomonadaceae/uncultured	95.6268	1e-158	356	96.3483	KJ704762.1 Uncultured bacterium clone c3-C12	100	6e-168	91
bin.CSSed10.167	SAMN08574459	PWJU00000000	Syntrophomonadaceae bacterium	CSSed10_167	1.62529	325	5.235	30.51	7.63018	52.4	1	1	1	14	65.05	6.28	38.89	>CS-Sed10-C126116-16S_rRNA-1|CS-Sed10-C126116	KP174559 bacterium YC-ZSS-LKJ23	Bacteria/Firmicutes_Clostridia_2/Clostridiales _Syntrophomonadaceae/uncultured	95.3704	2e-42	119	90.7563	KP174559.1 Bacterium YC-ZSS-LKJ23	95	2e-39	90
bin.CSSed11.101m	SAMN08574670	PWRW00000000	Syntrophomonadaceae bacterium	CSSed11_101m	1.42039	191	9.46	44.964	19.5612	44.527	2	1	1	34	68.4	3.23	20		ND	ND	ND	ND	<90	ND
bin.CSSed11.319	SAMN08574774	PWVW00000000	Syntrophomonadaceae bacterium	CSSed11_319	1.33194	342	3.785	11.033	10.1342	56.8	1	1	0	16	56.57	1.08	0		ND	ND	ND	ND	<90	ND
bin.T1Sed10.157	SAMN08575088	PWGT00000000	Syntrophomonadaceae bacterium	T1Sed10_157	2.05391	233	12.37	87.491	21.3881	41.2	1	4	0	26	56.9	0	0		ND	ND	ND	ND	<90	ND
bin.B1Sed10.173	SAMN08575208	PUNU00000000	Syntrophomonadaceae bacterium B1Sed10_173	B1Sed10_173	2.09772	299	8.923	55.784	34.7998	51.5	1	2	0	23	86.42	1.6	42.31		ND	ND	ND	ND	<90	ND
bin.CSSed10.145R1	SAMN08574449	PWJK00000000	Syntrophomonadaceae bacterium	CSSed10_145R1	3.16782	365	11.987	89.287	16.9744	44.9	3	0	2	33	86.34	4.66	15.38
bin.CSSed10.148R1	SAMN08574451	PWJM00000000	Syntrophomonadaceae bacterium	CSSed10_148R1	1.87058	183	15.81	66.194	40.5887	44.3	0	0	0	34	89.83	4.52	0
bin.CSSed10.252R1	SAMN08574513	PWLW00000000	Syntrophomonadaceae bacterium	CSSed10_252R1	1.19726	173	8.71	26.594	12.0531	45.3	0	0	0	13	52.42	0.92	50
bin.CSSed10.277R1	SAMN08574529	PWMM00000000	Syntrophomonadaceae bacterium	CSSed10_277R1	2.02007	342	6.927	24.724	17.4829	43.9	2	0	2	27	73.42	4.46	36.36
bin.CSSed10.39	SAMN08574588	PWOT00000000	Syntrophomonadaceae bacterium	CSSed10_39	2.25865	303	9.198	53.685	12.0783	46.3	0	0	0	27	85.59	4.24	42.86
bin.CSSed11.131	SAMN08574679	PWSF00000000	Syntrophomonadaceae bacterium	CSSed11_131	1.58454	373	4.215	19.618	13.0833	55.2	0	0	0	15	74.72	2.54	66.67
bin.CSSed11.134	SAMN08574680	PWSG00000000	Syntrophomonadaceae bacterium	CSSed11_134	1.62292	337	5.016	21.672	9.65557	45.7	1	0	0	12	76.49	2.62	20
bin.CSSed11.158R1m	SAMN08574693	PWST00000000	Syntrophomonadaceae bacterium	CSSed11_158R1m	1.87769	141	21.734	70.457	16.8568	51.534	1	0	0	33	51.69	6.53	0
bin.CSSed11.158R2	SAMN08574694	PWSU00000000	Syntrophomonadaceae bacterium	CSSed11_158R2	0.914925	62	34.079	96.35	6.98694	52.1	1	0	0	7	51.06	1.29	0
bin.CSSed11.160	SAMN08574696	PWSW00000000	Syntrophomonadaceae bacterium	CSSed11_160	1.93504	191	17.248	68.33	17.4538	46.4	1	0	1	35	69.65	7.13	50
bin.CSSed11.18	SAMN08574708	PWTI00000000	Syntrophomonadaceae bacterium	CSSed11_18	1.00646	174	6.609	27.144	20.6029	43.5	0	0	0	9	61.81	0.85	0
bin.CSSed11.206R1	SAMN08574719	PWTT00000000	Syntrophomonadaceae bacterium	CSSed11_206R1	0.63628	77	11.521	64.002	24.2465	52.9	0	0	0	9	51.31	0.92	0
bin.CSSed11.224R1	SAMN08574732	PWUG00000000	Syntrophomonadaceae bacterium	CSSed11_224R1	2.73143	437	7.251	53.929	32.0689	46.6	1	0	0	27	83.87	6.71	25
bin.CSSed11.224R2	SAMN08574733	PWUH00000000	Syntrophomonadaceae bacterium	CSSed11_224R2	2.97764	444	8.096	65.797	19.6176	46.1	1	0	0	48	58.75	5.08	0
bin.CSSed11.298R1	SAMN08574765	PWVN00000000	Syntrophomonadaceae bacterium	CSSed11_298R1	1.91105	286	8.457	32.583	11.8084	59.4	0	0	0	27	86.43	3.25	33.33
bin.CSSed11.39	SAMN08574782	PWWE00000000	Syntrophomonadaceae bacterium	CSSed11_39	2.56516	351	8.937	47.207	9.13037	45.4	0	0	0	22	88.98	1.69	40
bin.CSSed11.66	SAMN08574799	PWWV00000000	Syntrophomonadaceae bacterium	CSSed11_66	1.35108	264	5.57	17.17	7.62134	46.1	0	0	0	19	54.44	2.12	0
bin.CSSed11.70	SAMN08574802	PWWY00000000	Syntrophomonadaceae bacterium	CSSed11_70	1.22097	239	5.395	29.099	92.769	54.7	0	0	0	7	72.32	1.69	25
bin.CSSed11.9	SAMN08574814	PWXK00000000	Syntrophomonadaceae bacterium	CSSed11_9	0.912835	213	4.453	10.506	39.2195	52.9	0	0	0	1	50.41	0.21	0
bin.T1Sed10.110R1	SAMN08575058	PWHX00000000	Syntrophomonadaceae bacterium	T1Sed10_110R1	1.34063	155	11.096	83.99	32.6458	39.4	2	0	0	36	83.3	2.43	22.22
bin.T1Sed10.137m	SAMN08575079	PWHC00000000	Syntrophomonadaceae bacterium	T1Sed10_137m	3.59642	726	5.113	43.485	19.3931	42.94	0	0	0	20	53.93	9.21	12.5
bin.T1Sed10.145	SAMN08575084	PWGX00000000	Syntrophomonadaceae bacterium	T1Sed10_145	0.982902	56	47.648	103.629	21.9334	49	0	0	0	21	60.59	0	0
bin.T1Sed10.166	SAMN08575092	PWGP00000000	Syntrophomonadaceae bacterium	T1Sed10_166	3.34722	456	9.342	50.189	18.0282	49	0	0	0	35	83.84	9.05	47.62
bin.T1Sed10.174R1	SAMN08575093	PWGO00000000	Syntrophomonadaceae bacterium	T1Sed10_174R1	2.30557	190	17.372	55.336	17.3368	46.2	1	0	0	43	95.19	6.25	28.57
bin.T1Sed10.2	SAMN08575104	PWGD00000000	Syntrophomonadaceae bacterium	T1Sed10_2	1.8877	201	13.663	137.587	62.57	50.8	0	0	0	29	84.53	2.05	16.67
bin.T1Sed10.36	SAMN08575121	PWFM00000000	Syntrophomonadaceae bacterium	T1Sed10_36	1.76789	216	11.711	47.166	24.7592	50.5	1	0	0	24	74.76	1.23	16.67
bin.T1Sed10.50	SAMN08575127	PWFG00000000	Syntrophomonadaceae bacterium	T1Sed10_50	1.55203	256	6.924	30.565	17.787	44.5	0	0	0	13	52.87	3.39	25
bin.T1Sed10.56	SAMN08575130	PWFD00000000	Syntrophomonadaceae bacterium	T1Sed10_56	2.19904	118	48.076	128.177	29.2778	46.6	1	0	0	34	77.47	3.39	0
bin.T1Sed10.67	SAMN08575136	PWEX00000000	Syntrophomonadaceae bacterium	T1Sed10_67	1.27215	182	9.217	51.879	36.0829	44.5	1	0	0	25	67.34	1.91	0
bin.T1Sed10.68	SAMN08575137	PWEW00000000	Syntrophomonadaceae bacterium	T1Sed10_68	2.26371	215	17.518	118.832	15.3525	42.6	2	0	0	35	91.71	4.38	0
bin.T1Sed10.71R2	SAMN08575141	PWES00000000	Syntrophomonadaceae bacterium	T1Sed10_71R2	2.53172	285	12.476	115.051	20.6824	48.4	1	0	0	35	76.21	8.26	33.33
bin.T1Sed10.80R1	SAMN08575147	PWEM00000000	Syntrophomonadaceae bacterium	T1Sed10_80R1	1.72635	381	4.589	22.219	8.84164	45.7	1	0	1	17	61.52	3.88	25
bin.T1Sed10.93	SAMN08575158	PWEB00000000	Syntrophomonadaceae bacterium	T1Sed10_93	1.79409	306	6.475	31.573	44.4749	45.1	1	0	0	20	71.88	2.97	20
bin.T3Sed10.124	SAMN08574837	PWYG00000000	Syntrophomonadaceae bacterium	T3Sed10_124	1.47128	283	5.639	27.414	20.3795	55.1	0	0	0	19	71.12	2.61	22.22
bin.T3Sed10.127	SAMN08574840	PWYJ00000000	Syntrophomonadaceae bacterium	T3Sed10_127	2.28015	416	5.934	41.471	15.0863	45.6	0	0	0	16	72.88	9.07	19.05
bin.T3Sed10.148R1	SAMN08574851	PWYU00000000	Syntrophomonadaceae bacterium	T3Sed10_148R1	2.3887	127	42.875	121.068	1.62051	44.7	1	0	0	32	87.08	3.74	0
bin.T3Sed10.25	SAMN08574921	PXBM00000000	Syntrophomonadaceae bacterium	T3Sed10_25	1.49271	286	5.798	29.719	42.4593	46.4	0	0	0	17	69.84	0.66	0
bin.T3Sed10.337	SAMN08574975	PXDO00000000	Syntrophomonadaceae bacterium	T3Sed10_337	1.40431	382	3.546	11.302	9.24228	50.9	0	0	0	12	57.88	8.32	10.53
bin.T3Sed10.38	SAMN08574998	PXEL00000000	Syntrophomonadaceae bacterium	T3Sed10_38	1.66944	279	6.521	33.737	5.61106	46.1	0	0	0	16	74.72	0.42	0
bin.T3Sed10.7	SAMN08575016	PXFD00000000	Syntrophomonadaceae bacterium	T3Sed10_7	1.07741	204	5.699	18.809	21.5858	44.9	0	0	0	19	53.76	0	0
bin.T3Sed10.82	SAMN08575020	PXFH00000000	Syntrophomonadaceae bacterium	T3Sed10_82	1.94536	369	5.547	25.911	4.57003	45.7	0	0	0	25	62.73	6.04	33.33
bin.T3Sed10.85R1	SAMN08575023	PXFK00000000	Syntrophomonadaceae bacterium	T3Sed10_85R1	1.63417	61	82.166	164.396	1.59521	46.1	0	0	0	21	61.21	3.45	0
bin.B1Sed10.123	SAMN08575181	PUOV00000000	Syntrophomonadaceae bacterium B1Sed10_123	B1Sed10_123	2.20894	288	10.446	56.408	27.9448	50.3	0	0	0	26	83.31	6.84	64.29
bin.B1Sed10.154	SAMN08575198	PUOE00000000	Syntrophomonadaceae bacterium B1Sed10_154	B1Sed10_154	2.57758	347	10.477	51.865	44.3747	48.9	1	0	0	31	73.25	7.94	18.75
bin.B1Sed10.165	SAMN08575205	PUNX00000000	Syntrophomonadaceae bacterium B1Sed10_165	B1Sed10_165	1.65138	309	5.569	42.185	48.0854	51.7	0	0	0	30	61.21	5.17	25
bin.B1Sed10.21	SAMN08575230	PUMY00000000	Syntrophomonadaceae bacterium B1Sed10_21	B1Sed10_21	1.51825	243	7.284	31.88	50.5969	45	1	0	1	9	81.57	2.12	25
bin.B1Sed10.235	SAMN08575246	PUMI00000000	Syntrophomonadaceae bacterium B1Sed10_235	B1Sed10_235	1.85934	348	6.063	27.835	13.913	51.7	0	0	0	19	62.61	4.83	0
bin.B1Sed10.39R1	SAMN08575262	PULS00000000	Syntrophomonadaceae bacterium B1Sed10_39R1	B1Sed10_39R1	2.23486	286	10.275	38.495	10.3789	46	1	0	1	30	88.12	3.59	46.15
bin.B1Sed10.50	SAMN08575273	PULH00000000	Syntrophomonadaceae bacterium B1Sed10_50	B1Sed10_50	1.54659	216	8.9	63.474	40.3132	51	0	0	0	19	76.03	2.5	25
bin.B1Sed10.58	SAMN08575279	PULB00000000	Syntrophomonadaceae bacterium B1Sed10_58	B1Sed10_58	1.50777	283	5.714	17.099	10.7612	46.4	0	0	0	16	57.85	2.54	60
bin.B1Sed10.63	SAMN08575282	PUKY00000000	Syntrophomonadaceae bacterium B1Sed10_63	B1Sed10_63	1.51176	352	4.356	14.769	7.36824	46.3	0	0	0	15	50.9	6.43	10
bin.B1Sed10.74m	SAMN08575289	PUKR00000000	Syntrophomonadaceae bacterium B1Sed10_74m	B1Sed10_74m	1.80007	290	6.892	51.349	41.8548	47.099	0	0	0	27	74.24	3.11	0
bin.B1Sed10.8	SAMN08575293	PUKN00000000	Syntrophomonadaceae bacterium B1Sed10_8	B1Sed10_8	1.99115	335	7.369	33.679	24.8897	44.9	0	0	0	23	71.34	2.68	25
bin.CSSed10.428R1	SAMN08574610	PWPP00000000	Syntrophomonas sp.	CSSed10_428R1	1.37067	143	14.772	47.854	10.4052	48.2	0	0	0	25	57.66	0.84	66.67
